1        Transcriptional landscape of DNA repair genes underpins a pan-cancer prognostic  
2                    signature associated with cell cycle dysregulation and tumor hypoxia

3

4

5

6

Wai Hoong Chang and Alvina G. Lai

7

8

9

Nuffield Department of Medicine, University of Oxford,

10

Old Road Campus, Oxford, OX3 7FZ, United Kingdom

11

12

13

For correspondence: [alvina.lai@ndm.ox.ac.uk](mailto:alvina.lai@ndm.ox.ac.uk)

14 **Abstract**

15

16 Overactive DNA repair contributes to therapeutic resistance in cancer. However, pan-cancer  
17 comparative studies investigating the contribution of *all* DNA repair genes in cancer  
18 progression employing an integrated approach have remained limited. We performed a multi-  
19 cohort retrospective analysis to determine the prognostic significance of 138 DNA repair genes  
20 in 16 cancer types (n=16,225). Cox proportional hazards analyses revealed a significant  
21 variation in the number of prognostic genes between cancers; 81 genes were prognostic in  
22 clear cell renal cell carcinoma while only two genes were prognostic in glioblastoma. We  
23 reasoned that genes that were commonly prognostic in highly correlated cancers revealed by  
24 Spearman's correlation analysis could be harnessed as a molecular signature for risk  
25 assessment. A 10-gene signature, uniting prognostic genes that were common in highly  
26 correlated cancers, was significantly associated with overall survival in patients with clear cell  
27 renal cell (P<0.0001), papillary renal cell (P=0.0007), liver (P=0.002), lung (P=0.028), pancreas  
28 (P=0.00013) or endometrial (P=0.00063) cancers. Receiver operating characteristic analyses  
29 revealed that a combined model of the 10-gene signature and tumor staging outperformed  
30 either classifiers when considered alone. Multivariate Cox regression models incorporating  
31 additional clinicopathological features revealed that the signature was an independent  
32 predictor of overall survival. Tumor hypoxia is associated with adverse outcomes. Consistent  
33 across all six cancers, patients with high 10-gene and high hypoxia scores had significantly  
34 higher mortality rates compared to those with low 10-gene and low hypoxia scores. Functional  
35 enrichment analyses revealed that high mortality rates in patients with high 10-gene scores  
36 were attributable to an overproliferation phenotype. Death risk in these patients was further  
37 exacerbated by concurrent mutations of a cell cycle checkpoint protein, *TP53*. The 10-gene

38 signature identified tumors with heightened DNA repair ability. This information has the  
39 potential to radically change prognosis through the use of adjuvant DNA repair inhibitors with  
40 chemotherapeutic drugs.

41 [298 words]

42

43 **Keywords:** DNA repair, pan-cancer, cell cycle, hypoxia, tumor microenvironment

44

45 **List of abbreviations:**

|      |                                         |
|------|-----------------------------------------|
| DDR  | DNA damage response                     |
| BER  | Base excision repair                    |
| NER  | Nucleotide excision repair              |
| MR   | Mismatch repair                         |
| HDR  | Homology-directed repair                |
| NHEJ | Non-homologous end joining              |
| FA   | Fanconi anemia                          |
| TCGA | The Cancer Genome Atlas                 |
| GO   | Gene Ontology                           |
| KEGG | Kyoto Encyclopedia of Genes and Genomes |
| HR   | Hazard ratio                            |
| ROC  | Receiver operating characteristic       |
| AUC  | Area under the curve                    |
| TNM  | Tumor, node and metastasis              |
| CDK  | Cyclin-dependent kinase                 |
| DEG  | Differentially expressed genes          |

46

## 47 Introduction

48

49 Genetic material must be transmitted in its original, unaltered form during cell division.  
50 However, DNA faces continuous assaults from both endogenous and environmental agents  
51 contributing to the formation of permanent lesions and cell death. To overcome DNA damage  
52 threats, living systems have evolved highly coordinated cellular machineries to detect and  
53 repair damages as they occur. However, DNA repair mechanisms and consequently DNA  
54 damage responses (DDR) are often deregulated in cancer cells and such aberrations may  
55 contribute to cancer progression and influence prognosis. Overexpression of DNA repair genes  
56 allow tumor cells to overcome the cytotoxic effects of radiotherapy and chemotherapy. As  
57 such, inhibitors of DNA repair can increase the vulnerability of tumor cells to chemotherapeutic  
58 drugs by preventing the repair of deleterious lesions<sup>1</sup>.

59

60 There are six main DNA repair pathways in mammalian cells. Single-strand DNA damage are  
61 repaired by the base excision repair (BER), nucleotide excision repair (NER) and mismatch  
62 repair (MR) pathways. The poly(ADP-ribose) polymerase (PARP) gene family encodes key  
63 players of the BER pathway involved in repairing damages induced by ionizing radiation and  
64 alkylating agents<sup>2,3</sup>. Replication errors are corrected by the MR pathway while the NER  
65 pathway is responsible for removing bulky intercalating agents<sup>4,5</sup>. Tumor cells with deficiencies  
66 in the NER pathway have increased sensitivity to platinum-based chemotherapeutic drugs  
67 (cisplatin, oxaliplatin etc.)<sup>6,7</sup>. Double-strand breaks induced by ionizing radiation are more  
68 difficult to repair and thus are highly cytotoxic. Dysregulation of genes involved in the  
69 homology-directed repair (HDR), non-homologous end joining (NHEJ) and Fanconi anemia (FA)  
70 pathways are associated with altered repair of double-strand breaks.

71

72 Aberrations in DNA repair genes are widespread in most cancers; hence they represent  
73 attractive candidates for pharmacological targeting to improve radiosensitivity and  
74 chemosensitivity<sup>8</sup>. In a process known as ‘synthetic lethality’, faults in two or more DNA repair  
75 genes or pathways together would promote cell death, while defects in a single pathway may  
76 be tolerated<sup>1</sup>. Functional redundancies in repair pathways allow tumor cells to rely on a second  
77 pathway for repair in the event that the first pathway is defective. Based on the principles of  
78 synthetic lethality, inhibition of the second pathway will confer hypersensitivity to cytotoxic  
79 drugs in cells with another malfunctioning pathway. This promotes cell death because DNA  
80 lesions can no longer be repaired by either pathway. For instance, PARP inhibitors (targeting  
81 the BER pathway) could selectively kill tumor cells that have *BRCA1* or *BRCA2* mutations  
82 (defective HDR pathway) while not having any toxic effects on normal cells<sup>9,10</sup>.

83

84 Since one DDR pathway could compensate for another, there is a need for a pan-cancer, large-  
85 scale, systematic study on *all* DNA repair genes to reveal similarities and differences in DDR  
86 signaling between cancer types, which is limited at present. In this study, we explored pan-  
87 genomic expression patterns of 138 DNA repair genes in 16 cancer types. We developed and  
88 validated the prognostic significance of a 10-gene signature that can be used for rapid risk  
89 assessment and patient stratification. There are considerable variations in the success of  
90 chemotherapy and radiotherapy regimes between cancer types. Such differences may be  
91 explained by the complex cancer-specific nature of DDR defects. Prognostic biomarkers of DNA  
92 repair genes are needed to allow the use of repair inhibitors in a stratified, non-universal  
93 approach to expose the selective vulnerabilities of tumors to therapeutic agents.

## 94 Materials and methods

95 A list of 138 DNA repair genes is available in Table S1.

## 96 Study cohorts

97 We obtained RNA-sequencing datasets for the 16 cancers from The Cancer Genome Atlas  
98 (TCGA)<sup>11</sup> (n=16,225) (Table S2). TCGA Illumina HiSeq rnaseqv2 Level 3 RSEM normalized data  
99 were retrieved from the Broad Institute GDAC Firehose website. Gene expression profiles for  
100 each cancer types were separated into tumor and non-tumor categories based on TCGA  
101 barcodes and converted to  $\log_2(x + 1)$  scale. To compare the gene-by-gene expression  
102 distribution in tumor and non-tumor samples, violin plots were generated using R. The  
103 nonparametric Mann-Whitney-Wilcoxon test was used for statistical analysis.

104

## 105 Calculation of 10-gene scores and hypoxia scores

106 The 10-gene scores for each patient were determined from the mean  $\log_2$  expression values  
107 of 10 genes: *PRKDC*, *NEIL3*, *FANCD2*, *BRCA2*, *EXO1*, *XRCC2*, *RFC4*, *USP1*, *UBE2T* and *FAAP24*).  
108 Hypoxia scores were calculated from the mean  $\log_2$  expression values of 52 hypoxia signature  
109 genes<sup>12</sup>. For analyses in Figure 5, patients were delineated into four categories using median  
110 10-gene scores and hypoxia scores as thresholds. The nonparametric Spearman's rank-order  
111 correlation test was used to determine the relationship between 10-gene scores and hypoxia  
112 scores.

113

114 Differential expression analyses comparing expression profiles of high-score and low-score  
115 patients

116 Patients were median dichotomized into low- and high-score groups based on their 10-gene  
117 scores in each cancer type. Differential expression analyses were performed using the linear  
118 model and Bayes method executed by the limma package in R. P values were adjusted using  
119 the Benjamini-Hochberg false discovery rate procedure. We considered genes with  $\log_2$  fold  
120 change of  $> 1$  or  $< -1$  and adjusted P-values  $< 0.05$  as significantly differentially expressed  
121 between the two patient groups.

122

123

#### 124 Functional enrichment and pathway analyses

125 To determine which biological pathways were significantly enriched, differentially expressed  
126 genes were mapped against the Gene Ontology (GO) and Kyoto Encyclopedia of Genes and  
127 Genomes (KEGG) databases using GeneCodis<sup>13</sup>. The Enrichr tool was used to investigate  
128 transcription factor protein-protein interactions that were associated with the differentially  
129 expressed genes<sup>14,15</sup>.

130

131

#### 132 Survival analysis

133 Univariate Cox proportional hazards regression analyses were performed using the R survival  
134 and survminer packages to determine if expression levels of individual DNA repair genes as  
135 well as those of the 10-gene scores were significantly associated with overall survival.  
136 Multivariate Cox regression was employed to determine the influence of additional clinical  
137 variables on the 10-gene signature. Hazard ratios (HR) and confidence intervals were  
138 determined from the Cox models. HR greater than one indicated that a covariate was positively  
139 associated with even probability or increased hazard and negatively associated with survival

140 duration. Non-significant relationship between scaled Schoenfeld residuals supported the  
141 proportional hazards assumption in the Cox model. Both survival and survminer packages were  
142 also used for Kaplan-Meier analyses and log-rank tests. For Kaplan-Meier analyses, patients  
143 were median dichotomized into high- and low-score groups using the 10-gene signature. To  
144 determine the predictive performance (specificity and sensitivity) of the signature in relation  
145 to tumor staging parameters, we employed the receiver operating characteristic (ROC) analysis  
146 implemented by the R survcomp package, which also calculates area under the curve (AUC)  
147 values. AUC values can fall between 1 (perfect marker) and 0.5 (uninformative marker).

148

#### 149 *TP53* mutation analysis

150 TCGA mutation datasets (Level 3) were retrieved from GDAC Firehose to annotate patients  
151 with mutant *TP53*. To ascertain the association of *TP53* mutation with the 10-gene signature  
152 on overall survival, we employed the Kaplan-Meier analysis and log-rank tests implemented in  
153 R.

154

155 All plots were generated using R pheatmap and ggplot2 packages<sup>16</sup>. Venn diagram was  
156 generated using the InteractiVenn tool<sup>17</sup>.



157 **Results**

158

159 **Prognosis of DNA repair genes in 16 cancer types and the development of a 10-gene signature**

160 A total of 187 genes associated with six DDR pathways found in mammalian cells were curated:  
161 BER (33 genes), MR (23 genes), NER (39 genes), HDR (26 genes), NHEJ (13 genes) and FA (53  
162 genes)<sup>18</sup> (Fig. 1, Table S1). Of the 187 genes, 49 were represented in two or more pathways,  
163 yielding 138 non-redundant candidates. To determine which of the 138 DNA repair genes  
164 conferred prognostic information, we employed Cox proportional hazards regression on all  
165 genes individually on 16 cancer types to collectively include 16,225 patients<sup>11</sup> (Table S2). In  
166 clear cell renal cell carcinoma, 81 genes were found to be significantly associated with overall  
167 survival; this cancer had the highest number of prognostic DNA repair genes (Table S3). This is  
168 followed by 54, 53, 46, 44 and 33 prognostic genes in cancers of the pancreas, papillary renal  
169 cell, liver, lung and endometrium respectively (Table S3). In contrast, cancers of the brain  
170 (glioblastoma: 2 genes), breast (5 genes), cervix (6 genes) and esophagus (7 genes) had some  
171 of the lowest number of prognostic DNA repair genes (Table S3), suggesting that there is a  
172 significant degree of variation in the contribution of DNA repair genes in predicting survival  
173 outcomes. Spearman's rank-order correlation analysis revealed a hub of five highly correlated  
174 cancers (lung, papillary renal cell, pancreas, liver and endometrium), indicating that a good  
175 number of prognostic DNA repair genes were shared between these cancers (Spearman's  
176  $\rho=0.21$  to  $0.44$ ) (Fig. S1). We rationalized that prognostic genes that are common in these  
177 highly correlated cancers could form a new multigenic risk assessment classifier. Ten genes  
178 were prognostic in the five highly correlated cancers: *PRKDC* (NHEJ), *NEIL3* (BER), *FANCD2* (FA),  
179 *BRCA2* (HDR and FA), *EXO1* (MR), *XRCC2* (HDR), *RFC4* (MR and NER), *USP1* (FA), *UBE2T* (FA) and  
180 *FAAP24* (FA), which, interestingly, represent members from all six DDR pathways.

181

182 **A 10-gene signature predictive of DDR signaling is an independent prognostic classifier in 6**  
183 **cancer types**

184 The aforementioned ten genes were employed as a new prognostic model to evaluate whether  
185 they were significantly associated with overall survival in all 16 cancer types. A 10-gene score  
186 for each patient was calculated by taking the mean expression of all ten genes. Patients were  
187 median dichotomized based on their 10-gene scores into a low- and high-score groups. The  
188 10-gene signature could predict patients at significantly higher risk of death in the five cancers  
189 that were originally highly correlated (Fig. S1), and in one additional cancer (clear cell renal cell  
190 carcinoma) (Fig. 2). Kaplan-Meier analyses demonstrated that patients categorized within  
191 high-score groups had significantly poorer survival rates: clear cell renal cell (log-rank  
192  $P < 0.0001$ ), papillary renal cell ( $P = 0.0007$ ), liver ( $P = 0.002$ ), lung ( $P = 0.028$ ), pancreas  
193 ( $P = 0.00013$ ) and endometrium ( $P = 0.00063$ ) (Fig. 2). Expression profiles of the 10 genes in  
194 tumor and non-tumor samples showed a general distribution that were comparable among  
195 the six cancer types. Mann-Whitney-Wilcoxon tests revealed that a vast majority of genes were  
196 significantly upregulated in tumor samples with a few minor exceptions (Fig. S2). *USP1* was  
197 significantly downregulated in tumors of papillary renal cell and endometrium (Fig. S2). Only  
198 four non-tumor samples were available in the pancreatic cancer cohort, precluding robust  
199 statistical analyses. Due to limitations in sample size, only *UBE2T* was observed to be  
200 significantly upregulated in pancreatic tumors (Fig. S2).

201

202 To evaluate the independent predictive value of the signature over the current tumor, node  
203 and metastasis (TNM) staging system, we applied the signature on patients separated by TNM  
204 stage: early (stages 1 and/or 2), intermediate (stages 2 and/or 3) and late (stages 3 and/or 4)

205 disease stages. Remarkably, the signature successfully identified high risk patients in early  
206 (liver, lung, pancreas, endometrium), intermediate (papillary renal cell, liver, pancreas,  
207 endometrium) and late (clear cell renal cell, papillary renal cell, liver, endometrium) TNM  
208 stages (Fig. 3). Collectively, this implied that the signature offered an additional resolution of  
209 prognosis within similarly staged tumors and that the signature retained excellent prognostic  
210 ability in individual tumor groups when considered separately.

211

212 To evaluate the predictive performance of the 10-gene signature on 5-year overall survival, we  
213 employed receiver operating characteristic (ROC) analyses on all six cancers. Comparing the  
214 sensitivity and specificity of the signature in relation to TNM staging revealed that the signature  
215 outperformed TNM staging in cancers of the papillary renal cell (AUC=0.832 vs. AUC=0.640),  
216 pancreas (AUC=0.697 vs. AUC=0.593) and endometrium (AUC=0.700 vs. AUC=0.674) (Fig. 4).  
217 Importantly, when the signature was used in conjunction with TNM staging as a combined  
218 model, its performance was superior to either classifiers when they were considered  
219 individually: clear cell renal cell (AUC=0.792), papillary renal cell (AUC=0.868), liver  
220 (AUC=0.751), lung (AUC=0.693), pancreas (AUC=0.698) and endometrium (AUC=0.764) (Fig.  
221 4).

222

223 We next employed multivariate Cox regression models to examine whether the association  
224 between high 10-gene scores and increased mortality was not due to underlying clinical  
225 characteristics of the tumors. Univariate analysis revealed that TNM staging is not prognostic  
226 in pancreatic cancer (hazard ratio [HR]=1.339, P=0.153), hence this cancer was excluded from  
227 the multivariate model involving TNM (Table 1). For the five remaining cancer types, even  
228 when TNM staging was considered, the signature significantly distinguished survival outcomes

229 in high- versus low-score patients, confirming that it is an independent prognostic classifier:  
230 clear cell renal cell (HR=1.555, P=0.0058), papillary renal cell (HR=1.677, P=0.032), liver  
231 (HR=1.650, P=0.029), lung (HR=1.301, P=0.032) and endometrium (HR=2.113, P=0.013) (Table  
232 1).

233

234

### 235 Crosstalk between DDR signaling and tumor hypoxia

236 Tumor hypoxia is a well-known barrier to curative treatment. It is often associated with poor  
237 prognosis<sup>19,20</sup>, which may be a result of tumor resistance to chemotherapy and  
238 radiotherapy<sup>21,22</sup>. Since both the upregulation of DNA repair genes and hypoxia are linked to  
239 therapeutic resistance, we rationalized that incorporating hypoxia information in the 10-gene  
240 signature would allow further delineation of patient risk groups. Patients with high 10-gene  
241 scores had significantly poorer survival outcomes and we predict that these patients have  
242 tumors that are more hypoxic, and that oxygen deprivation could influence DDR signaling to  
243 enhance tumor resistance to apoptotic stimuli leading to more aggressive disease states. We  
244 calculated hypoxia scores for each patient using a mathematically derived hypoxia gene  
245 signature consisting of 52 genes<sup>12</sup>. Hypoxia scores were defined as the mean expression of the  
246 52 genes. Patients for each of the six cancer types were divided into four categories using the  
247 median 10-gene and hypoxia scores: 1) high scores for both 10-gene and hypoxia, 2) high 10-  
248 gene and low hypoxia scores, 3) low 10-gene and high hypoxia scores and 4) low scores for  
249 both 10-gene and hypoxia (Fig. 5A). Remarkably, significant positive correlations were  
250 observed between 10-gene scores and hypoxia scores consistent across all six cancer types:  
251 clear cell renal cell ( $\rho=0.363$ ,  $P<0.0001$ ), papillary renal cell ( $\rho=0.518$ ,  $P<0.0001$ ), liver  
252 ( $\rho=0.615$ ,  $P<0.0001$ ), lung ( $\rho=0.753$ ,  $P<0.0001$ ), pancreas ( $\rho=0.582$ ,  $P<0.0001$ ) and

253 endometrium ( $\rho=0.527$ ,  $P<0.0001$ ) (Fig. 5A). This suggests that tumor hypoxia may influence  
254 DDR signaling and potentially, patient outcomes.

255

256 We generated Kaplan-Meier curves and employed the log-rank test to determine whether  
257 there were differences in overall survival outcomes among the four patient groups. Combined  
258 relation of hypoxia and 10-gene scores revealed significant associations with overall survival in  
259 all six cancers (Fig. 5B). Patients classified within the 'high 10-gene and high hypoxia' category  
260 had significantly poorer survival rates compared to those with low 10-gene and low hypoxia  
261 scores: clear cell renal cell (HR=2.316,  $P<0.0001$ ), papillary renal cell (HR=7.635,  $P=0.0011$ ),  
262 liver (HR=2.615,  $P=0.00013$ ), lung (HR=1.832,  $P=0.0021$ ), pancreas (HR=2.680,  $P=0.00079$ ) and  
263 endometrium (HR=2.707,  $P=0.0075$ ) (Table 2; Fig. 5B). Our results suggest that the combined  
264 effects of hypoxia and heightened expression of DNA damage repair genes may be linked to  
265 tumor progression and increased mortality risks. It remains unknown in this context whether  
266 the basis for differential sensitivity to chemotherapy would be explained, in part, by DNA repair  
267 ability of tumor cells exposed to chronic hypoxia environments.

268

269

### 270 Patients with high 10-gene scores had an overproliferation phenotype due to cell cycle 271 dysregulation

272 The cell cycle represents a cellular gatekeeper that controls how cells grow and proliferate.  
273 Cyclins and cyclin-dependent kinases (CDKs) allow cells to progress from one cell cycle stage  
274 to the next; a process that is antagonized by CDK inhibitors. Many tumors overexpress cyclins  
275 or inactivate CDK inhibitors, hence resulting in uncontrolled cell cycle entry, loss of checkpoint  
276 and uninhibited proliferation<sup>23-25</sup>. Targeting proteins responsible for cell cycle progression

277 would thus be an attractive measure to limit tumor cell proliferation. This has led to the  
278 development of numerous CDK inhibitors as anticancer agents<sup>26,27</sup>. DNA repair is tightly  
279 coordinated with cell cycle progression. Certain DNA repair mechanisms are dampened in non-  
280 proliferating cells, while repair pathways are often perturbed during tumor development.  
281 Perturbation can take the form of defective DNA repair or over-compensation of a pathway  
282 arising from defects in another pathway<sup>28</sup>. As a result, DNA repair inhibitors could prevent the  
283 repair of lesions induced by chemotherapeutic drugs to trigger apoptosis and to enhance the  
284 elimination of tumor cells.

285

286 We rationalize that patients with high 10-gene scores would have heightened ability for DNA  
287 repair thus allowing tumor cells to progress through the cell cycle and continue to proliferate.  
288 Using Spearman's rank-order correlation, we observed that the expression of each of the 10  
289 signature genes were positively correlated with the expression of genes involved in cell cycle  
290 progression (cyclins and CDKs) and negatively correlated with genes involved in cell cycle arrest  
291 (CDK inhibitors) (Fig. 6A). Interestingly, the patterns of correlation were remarkably similar  
292 across all six cancer types, implying that elevated expression of DNA repair genes is associated  
293 with a hyper-proliferative phenotype. We next asked whether patients within the high 10-gene  
294 score category had an overrepresentation of processes associated with cell cycle dysregulation  
295 as this could provide an explanation on the elevated mortality risks in these patients. To answer  
296 this, we divided patients from each of the six cancer types into two groups (high score and low  
297 score) based on the mean expression of the 10 signature genes using the 50<sup>th</sup> percentile cut-  
298 off. Differential expression analyses between the high- and low-score groups revealed that  
299 394, 425, 1259, 1279, 714 and 977 genes were differentially expressed ( $-1 > \log_2$  fold-change

300 > 1,  $P < 0.05$ ) in clear cell renal cell, papillary renal cell, liver, lung, pancreas and endometrial  
301 cancers respectively (Table S4).

302

303 Analyses of biological functions of these genes revealed functional enrichment of ontologies  
304 associated with cell division, mitosis, cell cycle, cell proliferation, DNA replication and  
305 homologous recombination consistent in all six cancer types (Fig. 6B). This suggests that the  
306 significantly higher mortality rates in patients with high 10-gene scores were due to enhanced  
307 tumor cell proliferation exacerbated by the ability of these cells to repair DNA lesions as they  
308 arise. Additional ontologies related to tumorigenesis such as *PPAR* and *TP53* signaling were  
309 also associated with poor prognosis (Fig. 6B). A total of 87 differentially expressed genes (DEGs)  
310 were found to be in common in all six cancer types (Fig. S3) (Table S5). To dissect the underlying  
311 biological roles of the 87 DEGs at the protein level, we evaluated the enrichment of  
312 transcription factor protein-protein interactions using the Enrichr platform<sup>14</sup>. *TP53* represents  
313 the most enriched transcription factor involved in the regulation of the DEGs as evidenced by  
314 the highest combined score, which takes into account both Z score and P value (Table S6). This  
315 indirectly corroborated our results on enriched *TP53* signaling obtained from the KEGG  
316 pathway analysis (Fig. 6B). Taken together, these results highlight the interplay between DDR  
317 signaling, cell cycle regulation and *TP53* function in determining prognosis.

318

319

### 320 Prognostic relevance of a combined model involving the 10-gene signature and *TP53* mutation 321 status

322 An important role of *TP53* is its tumor suppressive function through *TP53*-mediated cell cycle  
323 arrest and apoptosis<sup>29</sup>. Hence, somatic mutations in *TP53* can confer tumor cells with growth

324 advantage and indeed, this is a well-known phenomenon in many cancers<sup>30–32</sup>. We rationalized  
325 that *TP53* deficiency resulting in defective checkpoint may synergize with the overexpression  
326 of DNA repair genes to prevent growth arrest and promote tumor proliferation. To test this  
327 hypothesis, we examined *TP53* mutation status in all six cancer types and observed that *TP53*  
328 mutation frequency was the highest in pancreatic cancer patients (58%) followed by lung  
329 cancer (57%), endometrial cancer (21%), liver cancer (16%), papillary renal cell (1.8%) and clear  
330 cell renal cell (1.2%) (Table S7). Cancers with *TP53* mutation frequency of at least 10% were  
331 selected for survival analyses. Univariate Cox regression analyses revealed that *TP53* mutation  
332 status only conferred prognostic information in pancreatic (HR=1.657, P=0.044), endometrial  
333 (HR=1.780, P=0.041) and liver (HR=2.603, P<0.0001) cancers but not in lung cancer (HR=1.428,  
334 P=0.056) (Table 1). Cancers where *TP53* mutation offered predictive value were taken forward  
335 for analyses in relation to the 10-gene signature. Cox regression analyses revealed that a  
336 combination of *TP53* mutation and high 10-gene score resulted in significantly higher risk of  
337 death (Table 3; Fig. 6C). Survival rates were significantly diminished in patients harboring high  
338 10-gene scores and the mutant variant of *TP53* compared to those with low 10-gene scores  
339 and wild-type *TP53*: liver (HR=3.876, P<0.0001), pancreas (HR=4.881, P=0.0002) and  
340 endometrium (HR=3.719, P=0.00028) (Table 3; Fig. 6C). Moreover, in multivariate Cox models  
341 involving TNM staging and *TP53* mutation status, the 10-gene signature remained a significant  
342 prognostic factor (Table 1). This suggests that although the 10-gene signature provided  
343 additional resolution in risk assessment when used in combination with *TP53* mutation status,  
344 its function is independent. However, in the multivariate model *TP53* was significant only in  
345 liver cancer (HR=2.085, P=0.0044), suggesting that *TP53* mutation was not independent of the  
346 signature or TNM staging in pancreatic and endometrial cancers (Table 1). Overall, the results  
347 suggest that defects in cell cycle checkpoint combined with augmented DNA repair ability were



348 adverse risk factors contributing to poor prognosis. Both *TP53* mutation status and 10-gene  
349 scores could offer additional predictive value in risk assessment by further delineation of  
350 patients into additional risk groups.

351

## 352 Discussion and Conclusion

353

354 We systematically examined the associations between the expression patterns of 138 DNA  
355 repair genes in 16 cancer types and prognosis. Our pan-cancer multigenic approach revealed  
356 genes that work synergistically across cancers to inform patient prognosis that would  
357 otherwise remain undetected in analysis involving a single gene or a single cancer type. We  
358 developed a 10-gene signature that incorporates the expression profiles of 10 highly correlated  
359 DNA repair genes for use as risk predictors in six cancer types (n=2,257). This signature offers  
360 a more precise discrimination of patient risk groups in these six cancers where high expression  
361 of signature genes is associated with poor survival outcomes. Importantly, we demonstrated  
362 that the signature can improve the prognostic discrimination of TNM when used as a combined  
363 model, which is particularly useful to allow further stratification of patients within similar TNM  
364 stage groups (Fig. 4).

365

366 Intrinsic differences in DNA repair machineries in cancer cells may pose a significant challenge  
367 to successful therapy. Mutations in DNA repair genes allow the generation of persistent DNA  
368 lesions that would otherwise be repaired. Germline mutations of DNA repair genes are linked  
369 to increased genome instability and cancer risks<sup>33</sup> and abrogation of genes in one DNA repair  
370 pathway can be compensated by another pathway<sup>1</sup>. *BRCA1* and *BRCA2* mutations sensitize  
371 cells to PARP1 inhibition, a protein involved in the BER pathway<sup>10</sup>. Since *BRCA1* and *BRCA2* are  
372 important for homology-directed repair, PARP1 inhibition in *BRCA1/2*-defective cells would  
373 result in dysfunctional HDR and BER pathways preventing lesion repair and thus leading to  
374 apoptosis<sup>10</sup>.

375

376 In addition to genetic polymorphism, upregulation of DNA repair genes in tumors could  
377 promote resistance to radiotherapy and chemotherapy as the cells would have enhanced  
378 ability to repair cytotoxic lesions induced by these therapies. Overexpression of *ERCC1* involved  
379 in the NER pathway in non-small-cell lung cancer is linked to poor survival in cisplatin-treated  
380 patients<sup>7</sup>. The 1,2-d(GpG) cross-link lesion generated by cisplatin treatment is readily repaired  
381 by the NER pathway, hence *ERCC1* overexpression would promote cisplatin resistance. Low  
382 *MGMT* expression in astrocytoma is associated with longer survival outcomes in patients  
383 treated with temozolomide<sup>34</sup>; an observation that is consistent with the role of *MGMT* in  
384 repairing lesions caused by temozolomide thus allowing *MGMT* deficient tumor cells to  
385 accumulate enough unreparable damage. *TP53* plays essential roles in cell-cycle arrest and  
386 apoptosis through the activation of checkpoint genes<sup>29</sup>. We show that patients with high 10-  
387 gene scores that concurrently have mutant *TP53* exhibited significantly higher mortality rates  
388 (Fig. 6C), suggesting that defects in cell cycle checkpoint coupled with an increase propensity  
389 for DNA repair may lead to dramatically poorer outcomes.

390

391 Multiple studies have reported the associations between dysfunctional DNA repair pathways  
392 and cancer, but most of these studies are restricted to investigations on a limited number of  
393 genes and on one cancer at a time. One of the key advantages of our study is that it is an  
394 unbiased exploration transcending the candidate-gene approach that takes into account the  
395 multifaceted interplay of DNA repair genes in diverse cancer types. We rationalize that since  
396 ionizing radiation and chemotherapy are the main treatment options currently available for  
397 cancer patients, a molecular signature capable of discriminating patients with increased  
398 expression of DNA repair genes that would benefit from adjuvant therapy through  
399 pharmacological inhibition of DNA repair to overall improve therapeutic outcomes.

400

401 Tumor hypoxia is also a well-known cause of therapy resistance. A notable finding of our study  
402 is that patients having both high 10-gene and hypoxia scores had significantly poorer survival  
403 rates compared to those with low 10-gene and hypoxia scores (Fig. 5). Previous reports suggest  
404 that low oxygen conditions may interfere with DNA damage repair. For example, hypoxia could  
405 compromise HR function through decreased *RAD51* expression<sup>35</sup>. However, results concerning  
406 the effects of hypoxia on DDR signaling have remained inconclusive. Genes associated with  
407 NHEJ were reported to be downregulated under hypoxia in prostate cancer cell lines<sup>36</sup>, while  
408 hypoxia drove the upregulation of NHEJ-associated genes, *PRKDC* and *XRCC6*, in hepatoma cell  
409 lines<sup>37</sup>. The authors proposed an interaction between *PRKDC* and the hypoxia-responsive  
410 transcriptional activator, HIF-1 $\alpha$ , hence suggesting that tumor hypoxia may lead to increase in  
411 NHEJ. Tumor cells within their 3D space are subjected to differential levels of oxygen over time  
412 and chronic exposures to these fluctuating conditions could result in very different biological  
413 outcomes. *In vitro* studies retain a significant caveat as many hypoxia assays are carried out  
414 short term using constant, predefined oxygen tensions. Although further work is needed to  
415 ascertain the clinical relevance of these findings, our results clearly demonstrate that the  
416 integration of hypoxia assessment in molecular stratification using the 10-gene signature  
417 revealed a subset of high-risk individuals accounting for approximately 31% to 38% in each  
418 cohort (Fig. 5B). Whether hypoxia could directly promote DNA damage repair *in vivo* remains  
419 an open question.

420

421 We reasoned that the expression patterns of DNA repair genes would positively correlate with  
422 genes involved in cell cycle progression since lesions could be repaired more effectively to  
423 prevent cell cycle arrest (Fig. 6A). Enhanced DNA repair ability may also confer tumor cells with

424 growth advantage. Consistent with this hypothesis, differential expression analyses between  
425 patients with high versus low 10-gene scores revealed an enrichment of ontologies involved in  
426 growth stimulation as a consequence of increased DNA repair gene expression (Fig. 6B).  
427 Enrichment of biological pathways involved in cell cycle, mitosis, cell division and DNA  
428 replication implied that the shorter life expectancy in patients with high 10-gene scores could  
429 in part be explained by an overproliferation phenotype commonly present in more aggressive  
430 tumors.

431

432 In summary, we developed a prognostic signature involving DNA repair genes and confirmed  
433 its utility as a powerful predictive marker for six cancer types. Although not currently afforded  
434 by this work due to its retrospective nature, it will be useful to determine if the signature can  
435 predict response to radiotherapy and chemotherapy in future research. While prospective  
436 validation is warranted, we would expect, based on our encouraging retrospective data, that  
437 the signature can guide decision making and treatment pathways. The confirmation of this  
438 hypothesis by a clinical trial using the 10-gene signature to select patients that would benefit  
439 from treatment with adjuvant DNA repair inhibitors could have a substantial impact on  
440 treatment outcomes.

441 **Conflict of Interest:** None declared.

442

443 **Funding:** None.

444

445 **Authors contribution.** WHC and AGL designed the study, analyzed the data and interpreted the  
446 data. AGL supervised the research. WHC and AGL wrote the initial manuscript draft. AGL  
447 revised the manuscript draft and approved the final version.

448

#### 449 **References**

450

- 451 1. Curtin NJ. DNA repair dysregulation from cancer driver to therapeutic target. *Nat Rev*  
452 *Cancer*. 2012;12(12):801.
- 453 2. Krishnakumar R, Kraus WL. The PARP side of the nucleus: molecular actions,  
454 physiological outcomes, and clinical targets. *Mol Cell*. 2010;39(1):8-24.
- 455 3. Sweasy JB, Lang T, DiMaio D. Is base excision repair a tumor suppressor mechanism?  
456 *Cell cycle*. 2006;5(3):250-259.
- 457 4. Martin SA, Lord CJ, Ashworth A. Therapeutic targeting of the DNA mismatch repair  
458 pathway. *Clin cancer Res*. 2010:432-1078.
- 459 5. Marteijn JA, Lans H, Vermeulen W, Hoeijmakers JHJ. Understanding nucleotide  
460 excision repair and its roles in cancer and ageing. *Nat Rev Mol cell Biol*.  
461 2014;15(7):465.
- 462 6. Usanova S, Piée-Staffa A, Sied U, et al. Cisplatin sensitivity of testis tumour cells is due  
463 to deficiency in interstrand-crosslink repair and low ERCC1-XPF expression. *Mol*  
464 *Cancer*. 2010;9(1):248.

- 465 7. Rosell R, Taron M, Barnadas A, Scagliotti G, Sarries C, Roig B. Nucleotide excision repair  
466 pathways involved in Cisplatin resistance in non-small-cell lung cancer. *Cancer Control*.  
467 2003;10(4):297-305.
- 468 8. Martin LP, Hamilton TC, Schilder RJ. Platinum resistance: The role of DNA repair  
469 pathways. *Clin Cancer Res*. 2008;14(5):1291-1295. doi:10.1158/1078-0432.CCR-07-  
470 2238.
- 471 9. Bryant HE, Schultz N, Thomas HD, et al. Specific killing of BRCA2-deficient tumours  
472 with inhibitors of poly (ADP-ribose) polymerase. *Nature*. 2005;434(7035):913.
- 473 10. Farmer H, McCabe N, Lord CJ, et al. Targeting the DNA repair defect in BRCA mutant  
474 cells as a therapeutic strategy. *Nature*. 2005;434(7035):917.
- 475 11. Weinstein JN, Collisson EA, Mills GB, et al. The cancer genome atlas pan-cancer  
476 analysis project. *Nat Genet*. 2013;45(10):1113.
- 477 12. Buffa FM, Harris AL, West CM, Miller CJ. Large meta-analysis of multiple cancers  
478 reveals a common, compact and highly prognostic hypoxia metagene. *Br J Cancer*.  
479 2010;102(2):428-435. doi:10.1038/sj.bjc.6605450.
- 480 13. Tabas-Madrid D, Nogales-Cadenas R, Pascual-Montano A. GeneCodis3: a non-  
481 redundant and modular enrichment analysis tool for functional genomics. *Nucleic*  
482 *Acids Res*. 2012;40(W1):W478--W483.
- 483 14. Kuleshov M V, Jones MR, Rouillard AD, et al. Enrichr: a comprehensive gene set  
484 enrichment analysis web server 2016 update. *Nucleic Acids Res*. 2016;44(W1):W90--  
485 W97.
- 486 15. Chen EY, Tan CM, Kou Y, et al. Enrichr: interactive and collaborative HTML5 gene list  
487 enrichment analysis tool. *BMC Bioinformatics*. 2013;14(1):128.
- 488 16. Wickham H. *Ggplot2: Elegant Graphics for Data Analysis*. Springer-Verlag New York;

- 489 2016. <http://ggplot2.org>.
- 490 17. Heberle H, Meirelles GV, da Silva FR, Telles GP, Minghim R. InteractiVenn: a web-based  
491 tool for the analysis of sets through Venn diagrams. *BMC Bioinformatics*.  
492 2015;16(1):169.
- 493 18. Wood RD, Mitchell M, Sgouros J, Lindahl T. Human DNA repair genes. *Science (80- )*.  
494 2001;291(5507):1284-1289.
- 495 19. Chang WH, Forde D, Lai AG. Dual prognostic role for 2-oxoglutarate oxygenases in ten  
496 diverse cancer types: Implications for cell cycle regulation and cell adhesion  
497 maintenance. *bioRxiv*. 2018. doi:10.1101/442947.
- 498 20. Chang WH, Forde D, Lai AG. A novel signature derived from immunoregulatory and  
499 hypoxia genes predicts prognosis in liver and five other cancers. *J Transl Med*.  
500 2019;17(1):14. doi:10.1186/s12967-019-1775-9.
- 501 21. Samanta D, Gilkes DM, Chaturvedi P, Xiang L, Semenza GL. Hypoxia-inducible factors  
502 are required for chemotherapy resistance of breast cancer stem cells. *Proc Natl Acad  
503 Sci*. 2014;111(50):E5429--E5438.
- 504 22. Semenza GL. Hypoxia-inducible factors: mediators of cancer progression and targets  
505 for cancer therapy. *Trends Pharmacol Sci*. 2012;33(4):207-214.
- 506 23. Sutherland RL, Musgrove EA. Cyclin D1 and mammary carcinoma: new insights from  
507 transgenic mouse models. *Breast cancer Res*. 2001;4(1):14.
- 508 24. Buckley MF, Sweeney KJ, Hamilton JA, et al. Expression and amplification of cyclin  
509 genes in human breast cancer. *Oncogene*. 1993;8(8):2127-2133.
- 510 25. Musgrove EA, Caldon CE, Barraclough J, Stone A, Sutherland RL. Cyclin D as a  
511 therapeutic target in cancer. *Nat Rev Cancer*. 2011;11(8):558.
- 512 26. Schwartz GK, Shah MA. Targeting the cell cycle: a new approach to cancer therapy. *J*



- 513 *Clin Oncol.* 2005;23(36):9408-9421.
- 514 27. Finn RS, Crown JP, Lang I, et al. The cyclin-dependent kinase 4/6 inhibitor palbociclib in  
515 combination with letrozole versus letrozole alone as first-line treatment of oestrogen  
516 receptor-positive, HER2-negative, advanced breast cancer (PALOMA-1/TRIO-18): a  
517 randomised phase 2 study. *Lancet Oncol.* 2015;16(1):25-35.
- 518 28. Helleday T, Petermann E, Lundin C, Hodgson B, Sharma RA. DNA repair pathways as  
519 targets for cancer therapy. *Nat Rev Cancer.* 2008;8(3):193.
- 520 29. Sengupta S, Harris CC. p53: traffic cop at the crossroads of DNA repair and  
521 recombination. *Nat Rev Mol cell Biol.* 2005;6(1):44.
- 522 30. Petitjean A, Achatz MIW, Borresen-Dale AL, Hainaut P, Olivier M. TP53 mutations in  
523 human cancers: functional selection and impact on cancer prognosis and outcomes.  
524 *Oncogene.* 2007;26(15):2157.
- 525 31. Olivier M, Langer A, Carrieri P, et al. The clinical value of somatic TP53 gene mutations  
526 in 1,794 patients with breast cancer. *Clin cancer Res.* 2006;12(4):1157-1167.
- 527 32. Skinner HD, Sandulache VC, Ow TJ, et al. TP53 disruptive mutations lead to head and  
528 neck cancer treatment failure through inhibition of radiation-induced senescence. *Clin*  
529 *cancer Res.* 2012;18(1):290-300.
- 530 33. Hoeijmakers JHJ. Genome maintenance mechanisms for preventing cancer. *Nature.*  
531 2001;411(6835):366.
- 532 34. Hegi ME, Diserens A-C, Godard S, et al. Clinical trial substantiates the predictive value  
533 of O-6-methylguanine-DNA methyltransferase promoter methylation in glioblastoma  
534 patients treated with temozolomide. *Clin cancer Res.* 2004;10(6):1871-1874.
- 535 35. Bindra RS, Schaffer PJ, Meng A, et al. Down-regulation of Rad51 and decreased  
536 homologous recombination in hypoxic cancer cells. *Mol Cell Biol.* 2004;24(19):8504-

537 8518.

538 36. Meng AX, Jalali F, Cuddihy A, et al. Hypoxia down-regulates DNA double strand break  
539 repair gene expression in prostate cancer cells. *Radiother Oncol*. 2005;76(2):168-176.

540 37. Um JH, Kang CD, Bae JH, et al. Association of DNA-dependent protein kinase with  
541 hypoxia inducible factor-1 and its implication in resistance to anticancer drugs in  
542 hypoxic tumor cells. *Exp Mol Med*. 2004;36(3):233.

543

544 **Figure legends**

545

546 **Figure 1.** Schematic representation of the study design and development of the 10-gene  
547 signature. DNA repair genes from six major pathways were manually curated to generate a  
548 non-redundant list containing 138 genes. Cox proportional hazards regression was employed  
549 to determine the significance of each individual genes in predicting overall survival in 16 cancer  
550 types. Spearman's correlation analyses revealed that five cancer types exhibited a high degree  
551 of correlation in terms of their prognostic genes. Ten genes were found to be prognostic in all  
552 five cancers; these genes subsequently formed the 10-gene signature. The ability of the  
553 signature in predicting survival outcomes was tested using Kaplan-Meier, Cox regression and  
554 receiver operating characteristic methods. The signature could predict high-risk patients in six  
555 cancer types (n=2,257). Associations of the signature with tumor hypoxia, cell cycle  
556 deregulation and *TP53* mutation were investigated. Potential clinical applications of the  
557 signature were proposed.

558

559 **Figure 2.** Patient stratification using the 10-gene signature in six cancer types. Kaplan-Meier  
560 analyses of overall survival on patients stratified into high- and low-score groups using the 10-  
561 gene signature. P values were determined from the log-rank test.

562

563 **Figure 3.** Independence of the 10-gene signature over TNM staging. Kaplan-Meier analyses  
564 were performed on patients categorized according to tumor TNM stages that were further  
565 stratified using the 10-gene signature. The signature successfully identified patients at higher  
566 risk of death in all TNM stages. P values were determined from the log-rank test. TNM: tumor,  
567 node, metastasis.

568

569 **Figure 4.** Predictive performance of the 10-gene signature. Receiver operating characteristic  
570 (ROC) was employed to determine the specificity and sensitivity of the signature in predicting  
571 5-year overall survival in all six cancer types. ROC curves generated based on the 10-gene  
572 signature, TNM staging and a combination of 10-gene signature and TNM staging were  
573 depicted. AUC: area under the curve. TNM: tumor, node, metastasis. AUCs for TNM staging  
574 were in accordance with previous publications employing TCGA datasets<sup>19,20</sup>.

575

576 **Figure 5.** Association between the 10-gene signature and tumor hypoxia. **(A)** Scatter plots  
577 depict significant positive correlation between 10-gene scores and hypoxia scores in all six  
578 cancers. Patients were color-coded and separated into four categories based on their 10-gene  
579 and hypoxia scores. **(B)** Kaplan-Meier analyses were performed on the four patient categories  
580 to assess the effects of combined relationship of hypoxia and the signature on overall survival.

581

582 **Figure 6.** Elevated DNA repair gene expression is associated with an overproliferation  
583 phenotype. **(A)** Significant positive correlations between individual signature gene expression  
584 and genes involved in cell cycle progression, while negative correlations were observed with  
585 genes involved in cell cycle arrest. Heatmaps were generated using the R pheatmap package.  
586 Cell cycle genes were depicted on the y-axis and the 10 signature genes on the x-axis. **(B)**  
587 Patients were median-stratified into low- and high-score groups using the 10-gene signature  
588 for differential expression analyses. Enrichment of GO and KEGG pathways associated with  
589 differentially expressed genes were depicted for all six cancers. **(C)** Investigation of the  
590 relationship between a gene involved in cell cycle checkpoint regulation, *TP53*, and the

591 signature. Patients were categorized into four groups based on their *TP53* mutation status and  
592 10-gene scores for Kaplan-Meier analyses. P values were determined from the log-rank test.

593

594 **Table 1.** Univariate and multivariate Cox proportional hazards analyses of the 10-gene  
595 signature and additional clinical risk factors associated with overall survival in six cancers.

596

597 **Table 2.** Univariate Cox proportional hazards analysis of the relation between the 10-gene  
598 signature and hypoxia score.

599

600 **Table 3.** Univariate Cox proportional hazards analysis of the relation between the 10-gene  
601 signature and *TP53* mutation status.

602 Supplementary information

603

604 **Figure S1.** Correlation analyses of 138 prognostic DNA repair genes. Spearman's correlation  
605 coefficients were determined from pairwise comparisons prognostic genes from 16 cancer  
606 types. Five cancers were highly correlated as shown in the blue area of the heatmap. Numbers  
607 represent correlation coefficient values. Refer to Table S2 for cancer abbreviations.

608

609 **Figure S2.** Expression distribution of the ten signature genes in tumor and non-tumor samples.  
610 Boxplots overlaying violin plots were used to illustrate tumor and non-tumor distribution in six  
611 cancers: **(A)** clear cell renal cell, **(B)** papillary renal cell, **(C)** liver, **(D)** lung, **(E)** pancreas and **(F)**  
612 endometrium. Nonparametric Mann-Whitney-Wilcoxon tests were employed to determine  
613 whether there were significant differences in expression distributions. Asterisks represent  
614 significant P values: \* < 0.05, \*\*\* < 0.0001.

615

616 **Figure S3.** Venn diagram depicts a six-way comparison of the differentially expressed genes (-  
617  $1 > \log_2$  fold-change  $> 1$ ,  $P < 0.05$ ) identified from high-score versus low-score patients in all six  
618 cancers. Numbers in parentheses represent the number of differentially expressed genes in  
619 each cancer. The Venn intersection of all cancers indicated that 87 genes were common.

620

621 **Table S1.** List of 138 DNA repair genes and associated pathways.

622

623 **Table S2.** Description of TCGA cancer cohorts.

624

625 **Table S3.** Univariate Cox proportional hazards analysis of the 138 genes in 16 cancers.

626

627 **Table S4.** Differentially expressed genes between high- and low-score patient groups in six  
628 cancers.

629

630 **Table S5.** List of 87 differentially expressed genes that are common in all six cancers.

631

632 **Table S6.** Enrichr transcription factor protein-protein interaction analysis of the 87  
633 differentially expressed genes.

634

635 **Table S7.** *TP53* mutation analysis in liver, pancreatic, endometrial and lung cancers.

# Figure 1

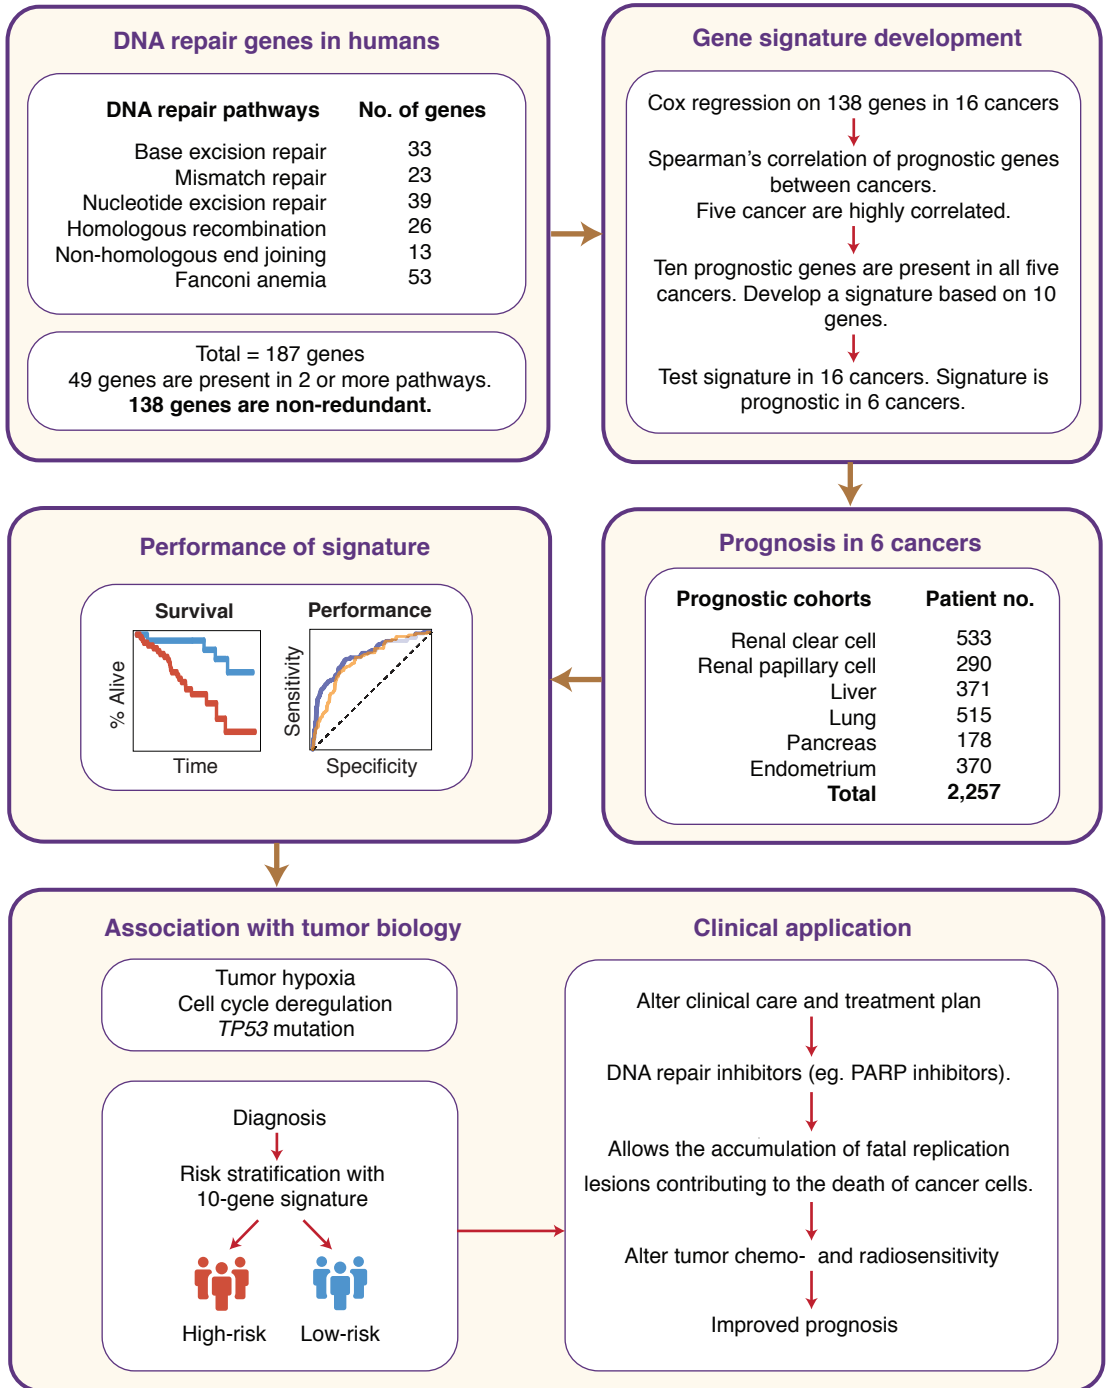



# Figure 2

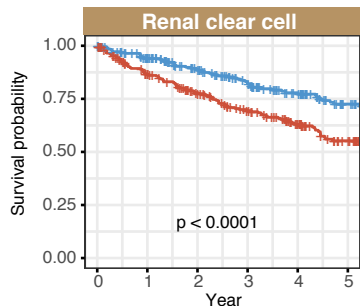

Number at risk

|            |     |     |     |     |     |    |
|------------|-----|-----|-----|-----|-----|----|
| Low score  | 261 | 225 | 182 | 150 | 117 | 80 |
| High score | 263 | 210 | 173 | 139 | 104 | 72 |

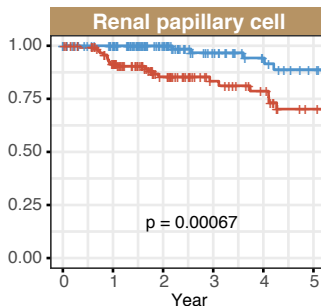

Number at risk

|            |     |     |    |    |    |    |
|------------|-----|-----|----|----|----|----|
| Low score  | 129 | 114 | 76 | 48 | 35 | 27 |
| High score | 127 | 102 | 62 | 39 | 30 | 19 |

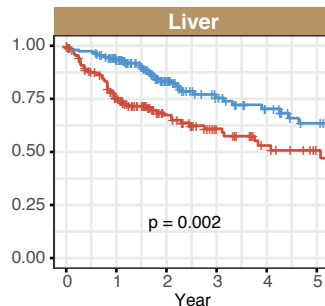

Number at risk

|            |     |     |    |    |    |    |
|------------|-----|-----|----|----|----|----|
| Low score  | 157 | 133 | 74 | 48 | 36 | 25 |
| High score | 156 | 101 | 57 | 36 | 23 | 14 |

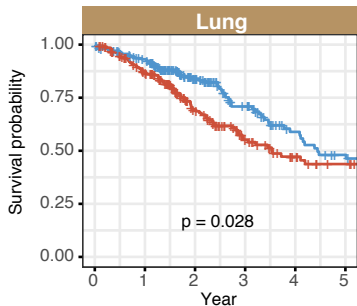

Number at risk

|            |     |     |     |    |    |    |
|------------|-----|-----|-----|----|----|----|
| Low score  | 210 | 181 | 103 | 64 | 38 | 28 |
| High score | 209 | 163 | 86  | 48 | 29 | 21 |

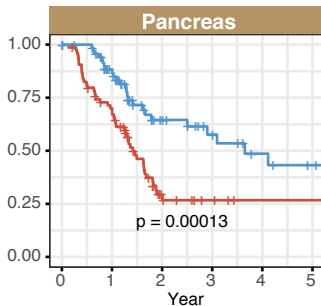

Number at risk

|            |    |    |    |    |   |   |
|------------|----|----|----|----|---|---|
| Low score  | 74 | 54 | 23 | 15 | 9 | 6 |
| High score | 75 | 49 | 11 | 4  | 1 | 1 |

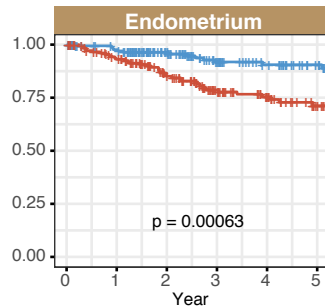

Number at risk

|            |     |     |     |    |    |    |
|------------|-----|-----|-----|----|----|----|
| Low score  | 184 | 164 | 122 | 88 | 70 | 55 |
| High score | 184 | 157 | 119 | 82 | 63 | 41 |

# Figure 3

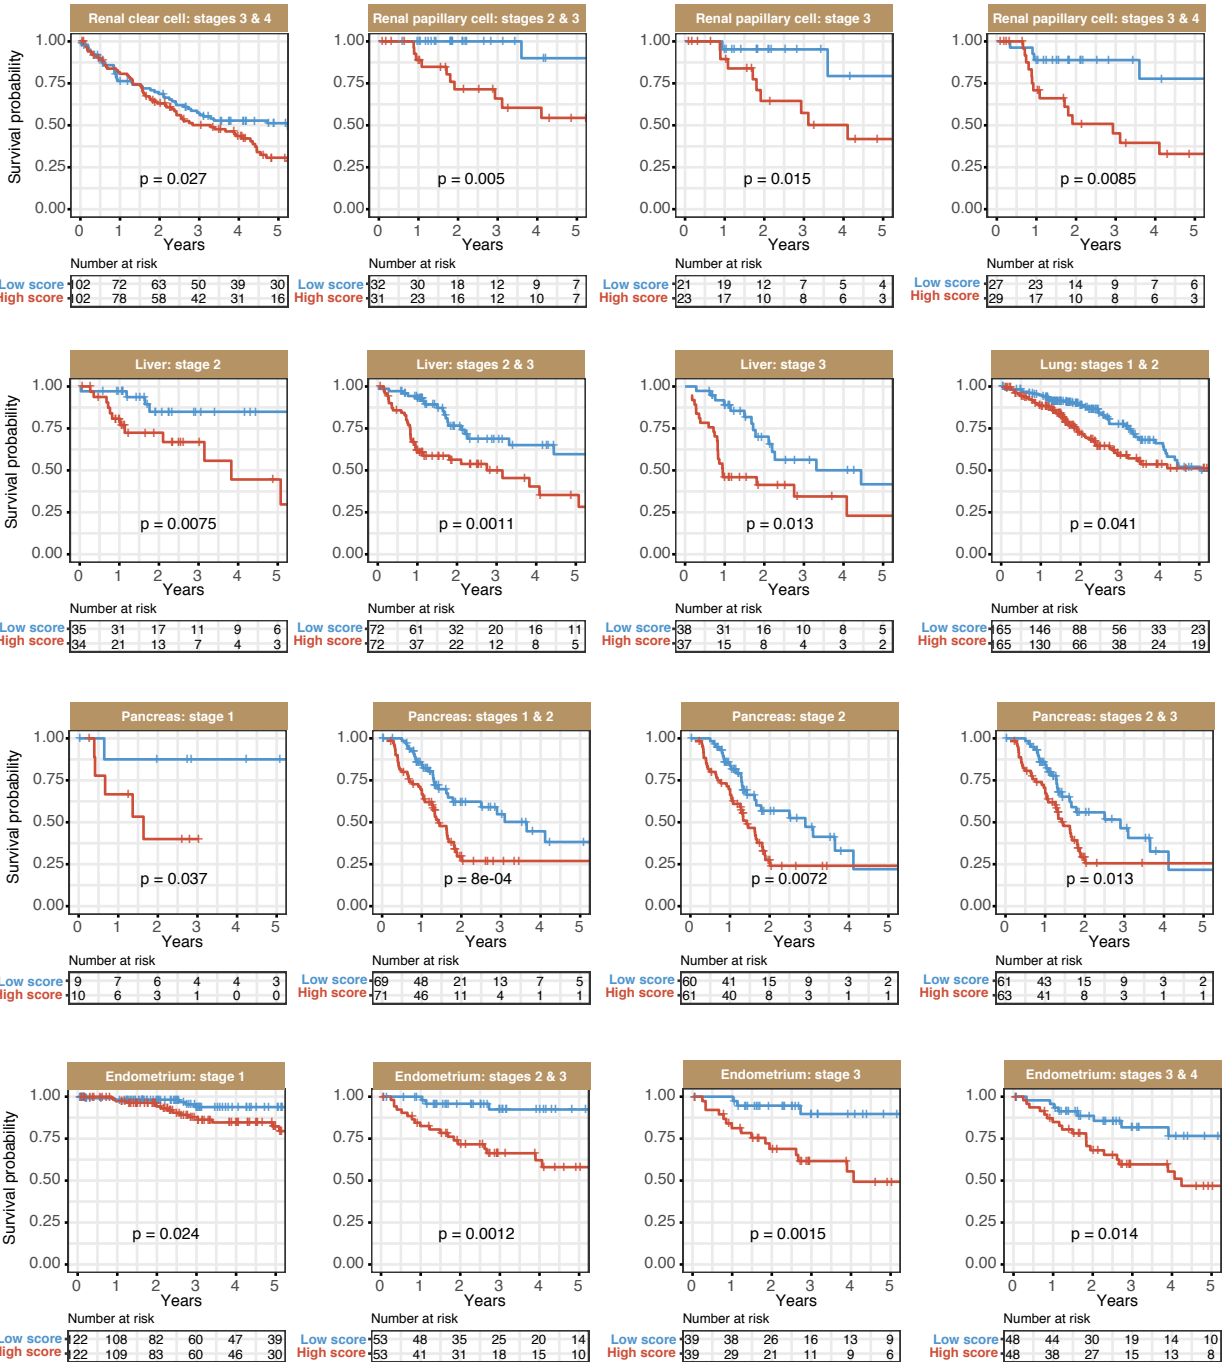

**Figure 4**

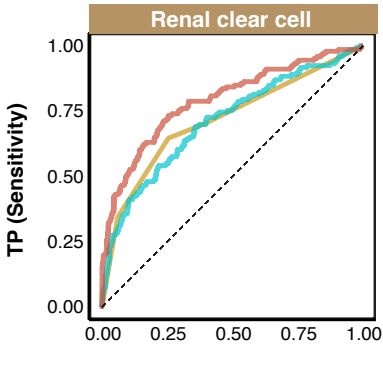

| Classifier      | AUC   |
|-----------------|-------|
| TNM             | 0.716 |
| Signature       | 0.711 |
| Signature + TNM | 0.792 |

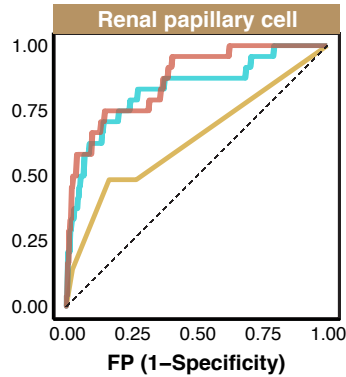

| Classifier      | AUC   |
|-----------------|-------|
| TNM             | 0.640 |
| Signature       | 0.832 |
| Signature + TNM | 0.868 |

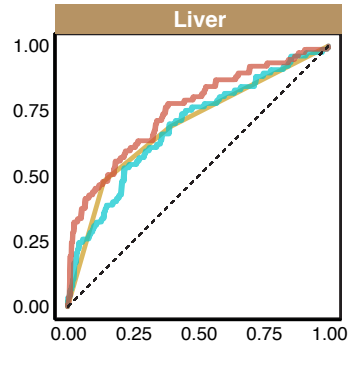

| Classifier      | AUC   |
|-----------------|-------|
| TNM             | 0.697 |
| Signature       | 0.689 |
| Signature + TNM | 0.751 |

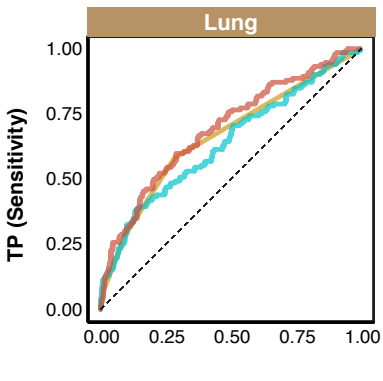

| Classifier      | AUC   |
|-----------------|-------|
| TNM             | 0.663 |
| Signature       | 0.639 |
| Signature + TNM | 0.693 |

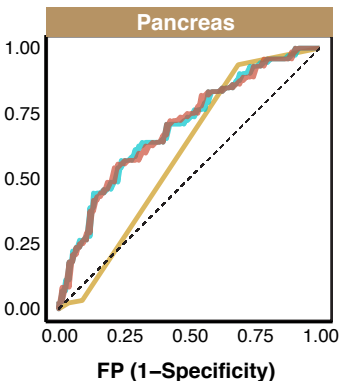

| Classifier      | AUC   |
|-----------------|-------|
| TNM             | 0.593 |
| Signature       | 0.697 |
| Signature + TNM | 0.698 |

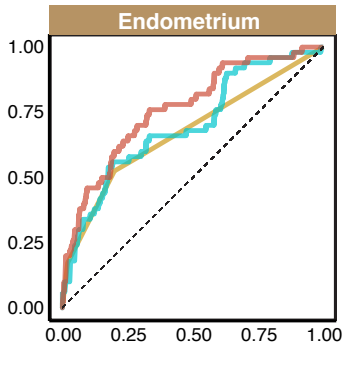

| Classifier      | AUC   |
|-----------------|-------|
| TNM             | 0.674 |
| Signature       | 0.700 |
| Signature + TNM | 0.764 |

# Figure 5

**A**

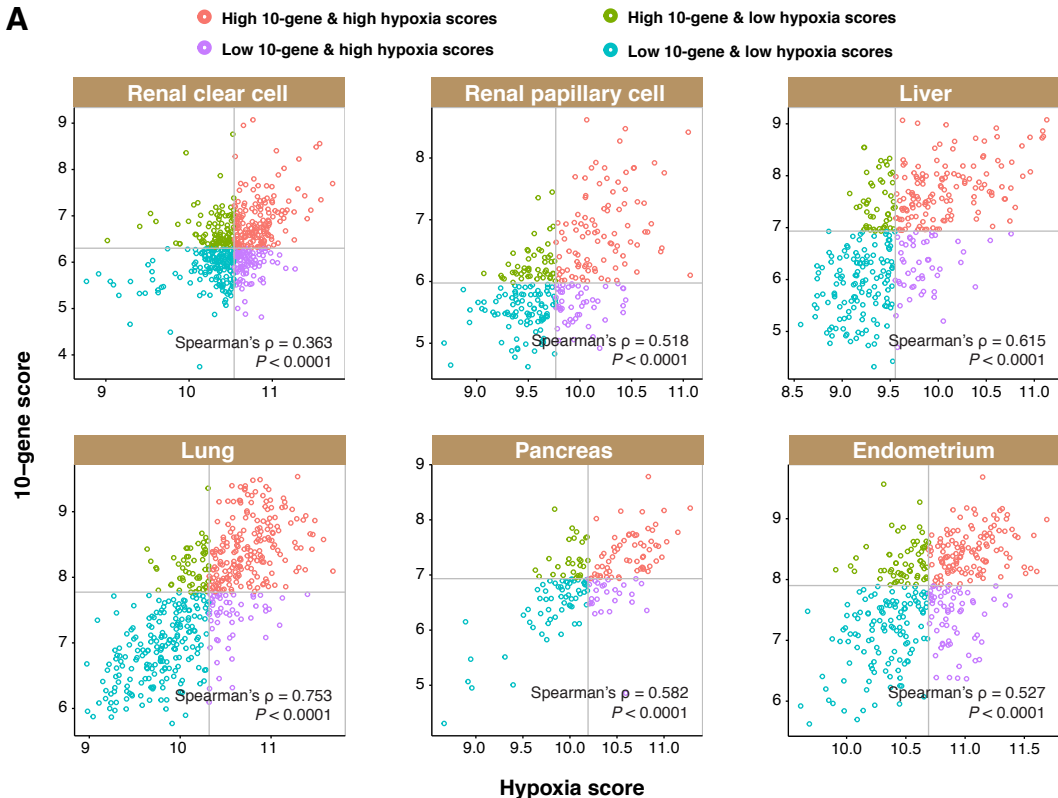

**B**

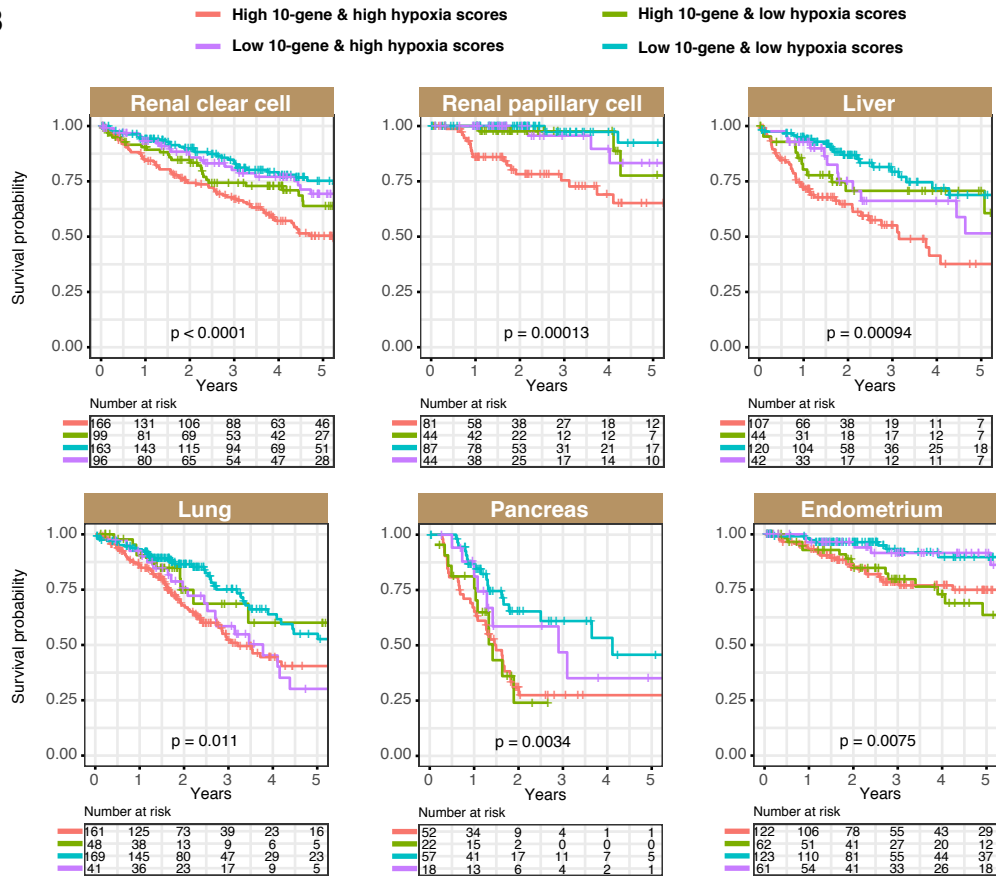

**Figure 6**

**A**

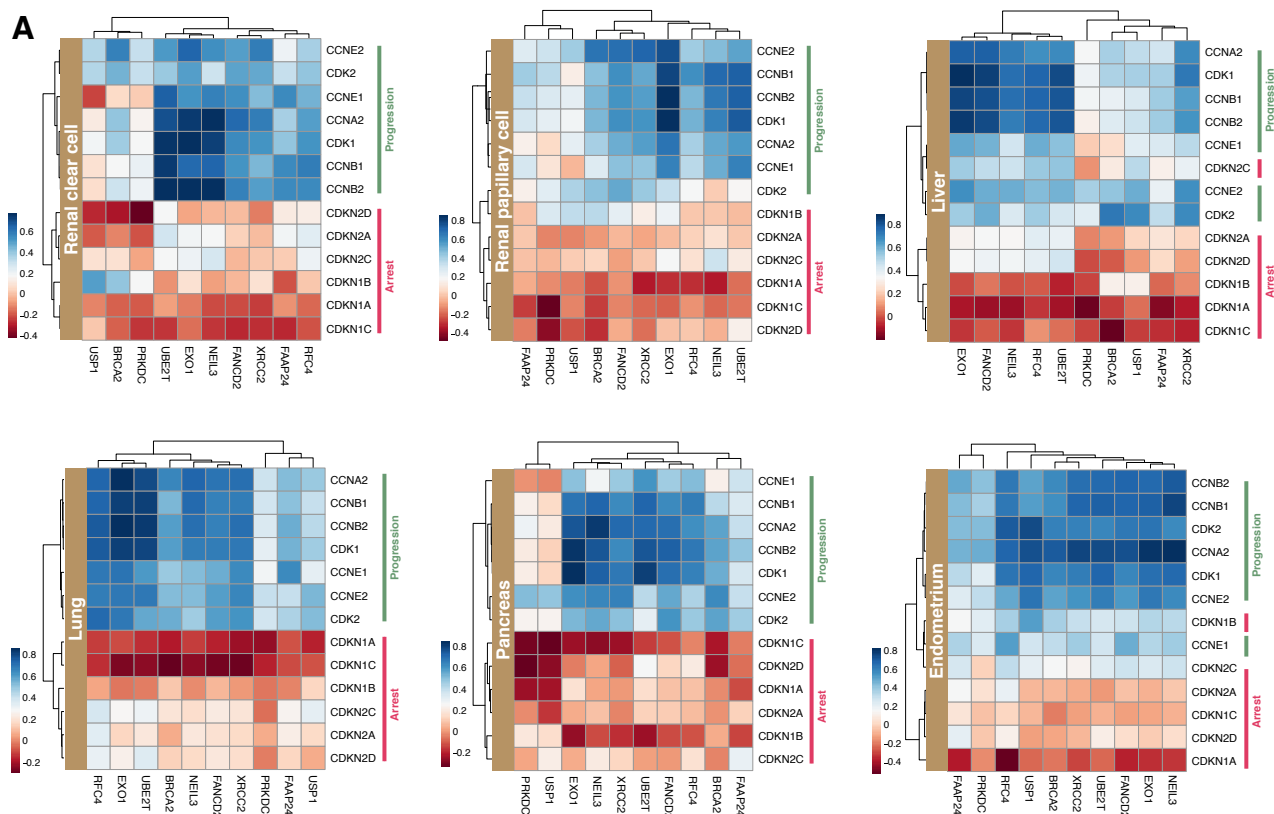

**B**

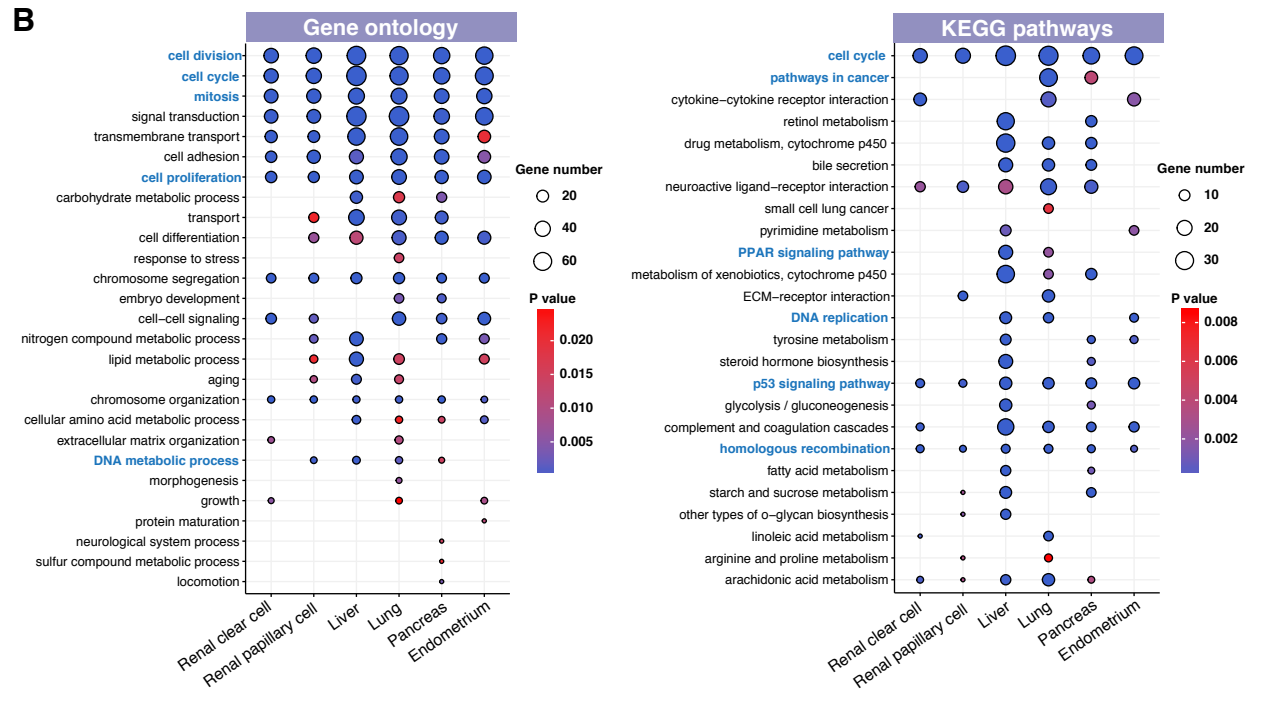

**C**

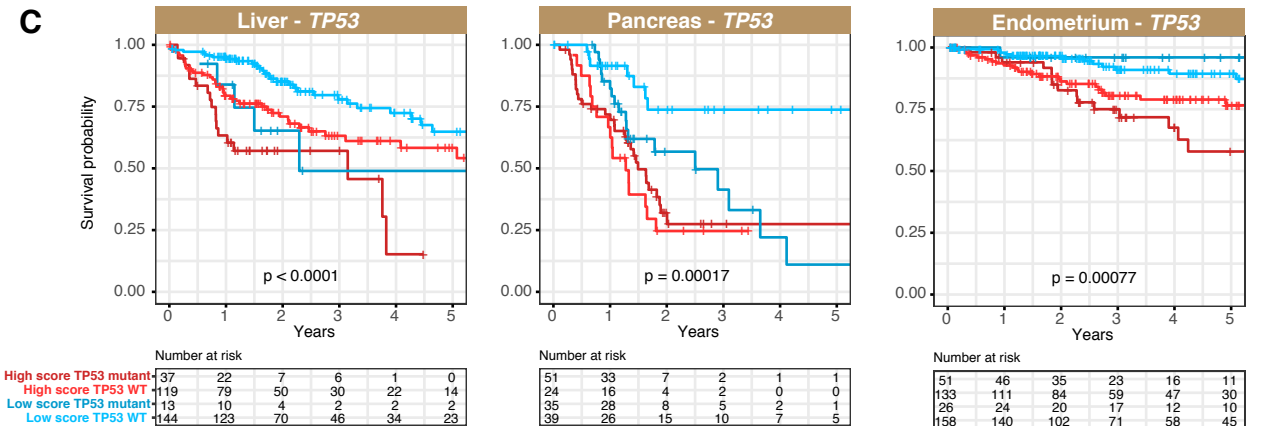

Figure S1

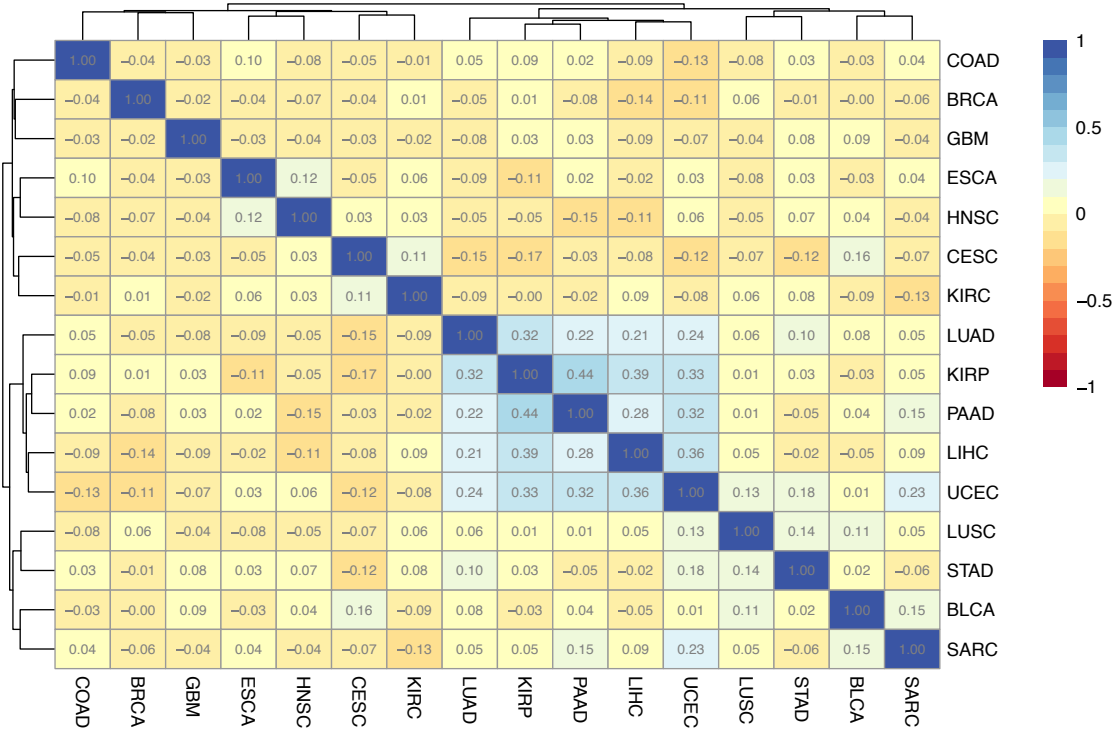

# Figure S2

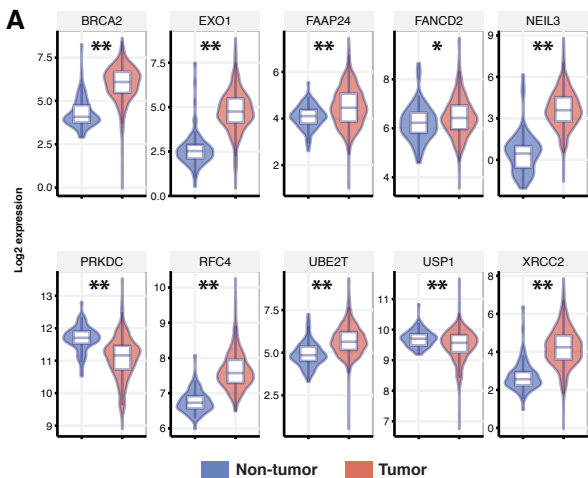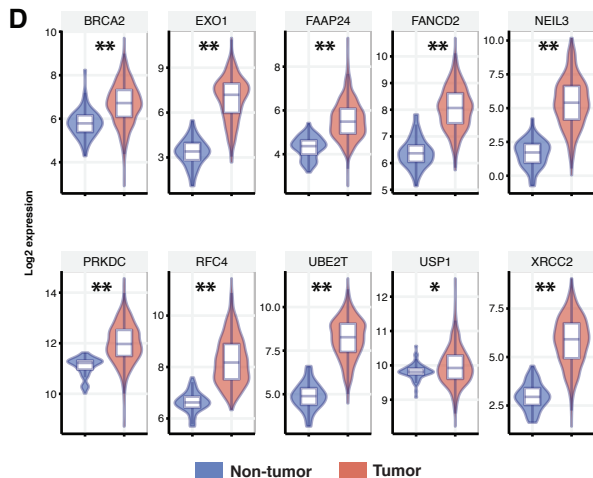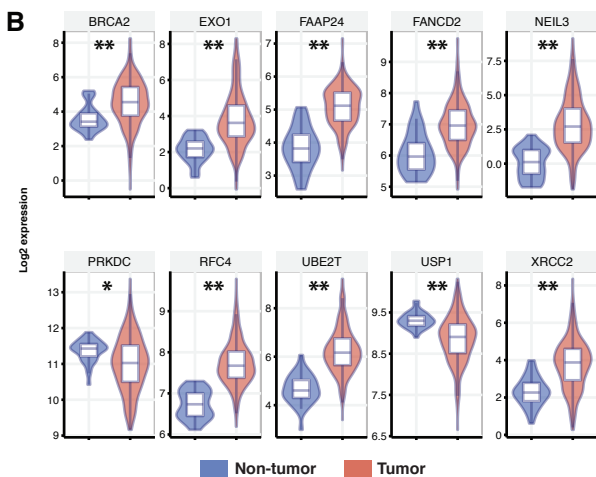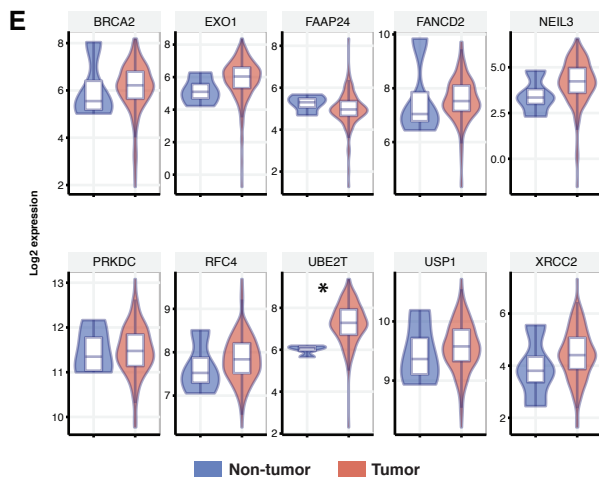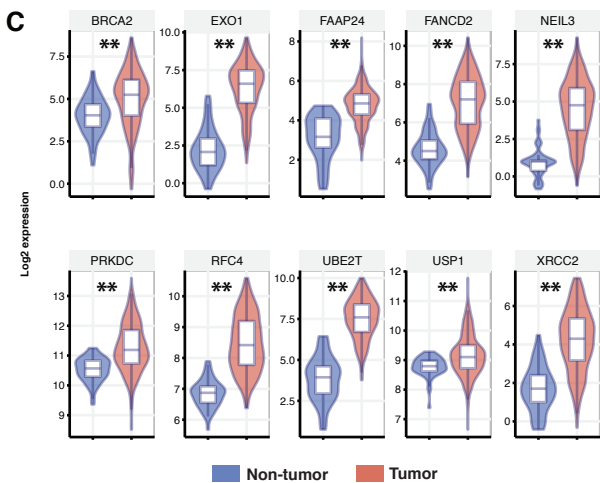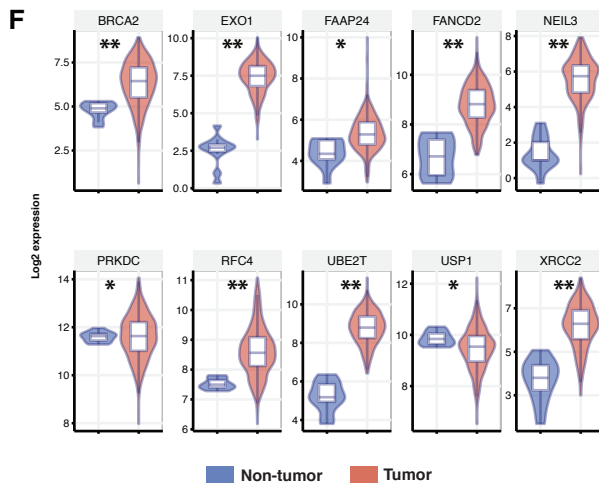

Figure S3

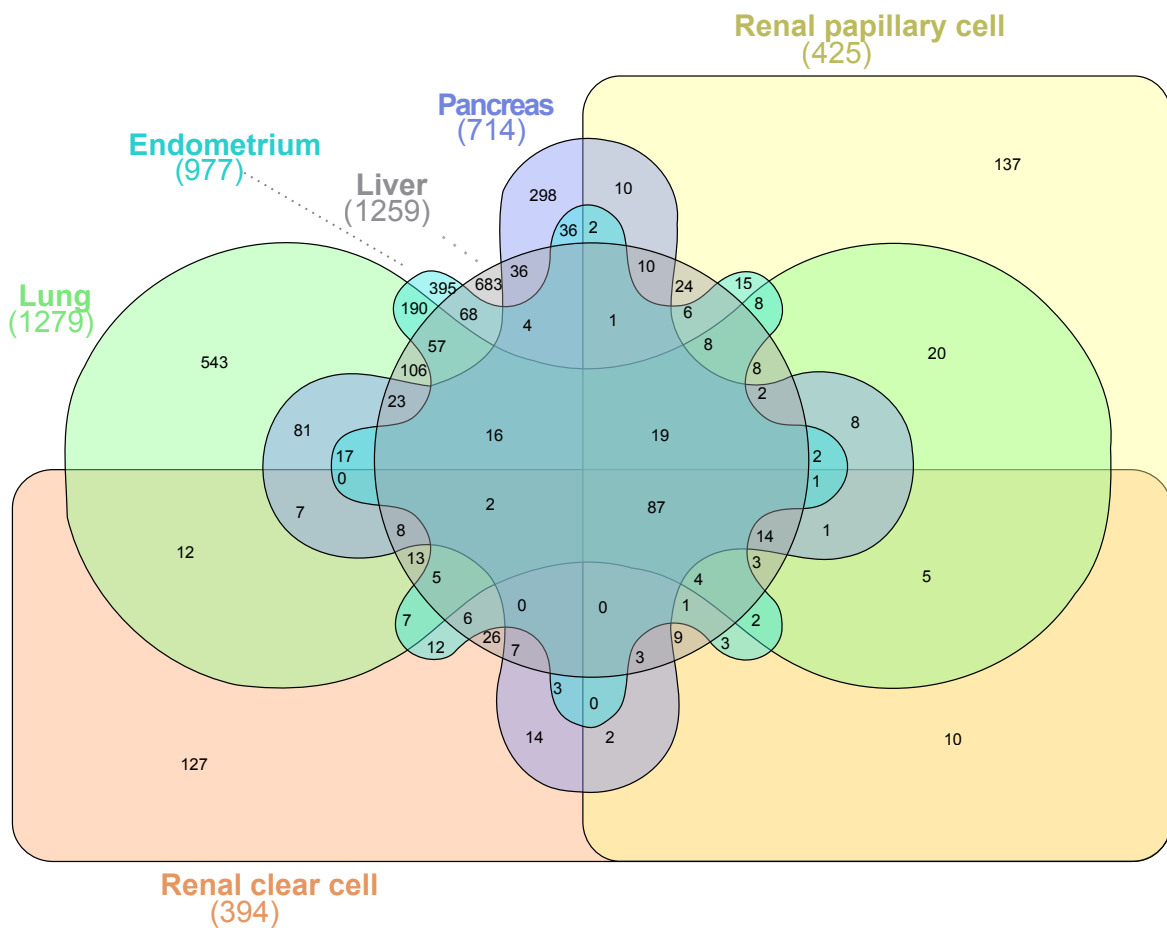

Source: https://www.biorxiv.org/content/biorxiv/early/2019/01/13/519603.full.pdf
